# Supplementary material for: miR-451a Regulates Neuronal Apoptosis by Modulating 14-3-3ζ-JNK Axis upon Flaviviral Infection
Source: PubMed Central journal article supplement (PMC9429931; doi:10.1128/msphere.00208-22), 2022-06-21
Supplement: msphere.00208-22-s0001.pdf [file msphere.00208-22-s0001.pdf]

**Supplementary Table: 1, Expression data of miRNA in neurons upon JEV infection.**

| <b>miRNA name</b> | <b>Relative fold Change</b> | <b><i>P</i>-value</b> |
|-------------------|-----------------------------|-----------------------|
| mmu-let-7a-5p     | 0.96                        | 0.753446              |
| mmu-let-7c-5p     | 0.97                        | 0.396516              |
| mmu-let-7e-5p     | 1.02                        | 0.506136              |
| mmu-let-7g-5p     | 1.02                        | 0.33142               |
| mmu-miR-101a-3p   | 1.3                         | 0.050812              |
| mmu-miR-106b-5p   | 0.91                        | 0.036762              |
| mmu-miR-122-5p    | 0.98                        | 0.577617              |
| mmu-miR-125a-5p   | 1.04                        | 0.31025               |
| mmu-miR-125b-5p   | 0.92                        | 0.045782              |
| mmu-miR-128-3p    | 1.05                        | 0.204907              |
| mmu-miR-133a-3p   | 1                           | 0.054275              |
| mmu-miR-133b-3p   | 0.98                        | 0.577617              |
| mmu-miR-134-5p    | 1.19                        | 0.290283              |
| mmu-miR-141-3p    | 0.98                        | 0.577617              |
| mmu-miR-143-3p    | 0.9                         | 0.104732              |
| mmu-miR-144-3p    | 1.02                        | 0.888292              |
| mmu-miR-145a-5p   | 0.84                        | 0.005482              |
| mmu-miR-146a-5p   | 0.85                        | 0.032354              |
| mmu-miR-148a-3p   | 0.93                        | 0.509268              |
| mmu-miR-153-3p    | 0.85                        | 0.000528              |

|                 |      |          |
|-----------------|------|----------|
| mmu-miR-155-5p  | 0.98 | 0.577617 |
| mmu-miR-15a-5p  | 0.97 | 0.091484 |
| mmu-miR-15b-5p  | 0.98 | 0.587355 |
| mmu-miR-16-5p   | 0.98 | 0.463509 |
| mmu-miR-17-5p   | 0.96 | 0.283228 |
| mmu-miR-181a-5p | 0.87 | 0.052159 |
| mmu-miR-181b-5p | 0.95 | 0.038985 |
| mmu-miR-181c-5p | 0.86 | 0.103826 |
| mmu-miR-181d-5p | 0.94 | 0.177111 |
| mmu-miR-183-5p  | 1.57 | 0.078161 |
| mmu-miR-185-5p  | 0.98 | 0.721462 |
| mmu-miR-186-5p  | 0.97 | 0.330925 |
| mmu-miR-192-5p  | 0.99 | 0.865071 |
| mmu-miR-194-5p  | 0.97 | 0.255591 |
| mmu-miR-195a-5p | 0.98 | 0.676294 |
| mmu-miR-1a-3p   | 1.07 | 0.663588 |
| mmu-miR-200c-3p | 0.6  | 0.082836 |
| mmu-miR-203-3p  | 1.97 | 0.000341 |
| mmu-miR-204-5p  | 1.14 | 0.419405 |
| mmu-miR-205-5p  | 1.23 | 0.048839 |
| mmu-miR-206-3p  | 0.98 | 0.577617 |
| mmu-miR-20a-5p  | 0.95 | 0.269971 |
| mmu-miR-21a-5p  | 0.94 | 0.241312 |

|                |      |          |
|----------------|------|----------|
| mmu-miR-210-3p | 0.99 | 0.826484 |
| mmu-miR-214-3p | 0.9  | 0.005633 |
| mmu-miR-218-5p | 1    | 0.897238 |
| mmu-miR-221-3p | 1.02 | 0.781708 |
| mmu-miR-222-3p | 1.27 | 0.363371 |
| mmu-miR-23a-3p | 1.01 | 0.596705 |
| mmu-miR-24-3p  | 1.01 | 0.786623 |
| mmu-miR-25-3p  | 1.05 | 0.25202  |
| mmu-miR-26a-5p | 1    | 0.962727 |
| mmu-miR-26b-5p | 1.06 | 0.322705 |
| mmu-miR-27a-3p | 1.05 | 0.299538 |
| mmu-miR298-5p  | 0.67 | 0.000111 |
| mmu-miR-29a-3p | 1.09 | 0.048376 |
| mmu-miR-29b-3p | 1.2  | 0.253167 |
| mmu-miR-29c-3p | 1.06 | 0.066093 |
| mmu-miR-30a-5p | 0.95 | 0.293773 |
| mmu-miR-30b-5p | 1    | 0.976067 |
| mmu-miR-30c-5p | 1.03 | 0.179838 |
| mmu-miR-30d-5p | 0.94 | 0.197234 |
| mmu-miR-30e-5p | 0.96 | 0.242047 |
| mmu-miR-31-5p  | 1.02 | 0.776031 |
| mmu-miR-32-5p  | 0.93 | 0.03757  |
| mmu-miR-338-3p | 1.26 | 0.466962 |
| mmu-miR-34a-5p | 1.01 | 0.872139 |

|                 |      |          |
|-----------------|------|----------|
| mmu-miR-34c-5p  | 0.98 | 0.577617 |
| mmu-miR-351-5p  | 0.86 | 0.717421 |
| mmu-miR-365-3p  | 0.9  | 0.11131  |
| mmu-miR-378a-3p | 0.91 | 0.060096 |
| mmu-miR-409-3p  | 1.08 | 0.561543 |
| mmu-miR-449a-5p | 1.01 | 0.642826 |
| mmu-miR-451a    | 2.94 | 0.011876 |
| mmu-miR-4661-3p | 1.15 | 0.068807 |
| mmu-miR-491-5p  | 0.6  | 0.001293 |
| mmu-miR-497a-5p | 0.97 | 0.657375 |
| mmu-miR-503-5p  | 0.87 | 0.123504 |
| mmu-miR-542-3p  | 0.98 | 0.577617 |
| mmu-miR-708-5p  | 1.44 | 0.030674 |
| mmu-miR-7a-5p   | 1.16 | 0.001169 |
| mmu-miR-9-5p    | 1.21 | 0.232862 |
| mmu-miR-92a-3p  | 0.85 | 0.163258 |
| mmu-miR-98-5p   | 1.04 | 0.544681 |
